# Supplementary material for: Phylogeny of Paleozoic limbed vertebrates reassessed through revision and expansion of the largest published relevant data matrix
Source: PeerJ. 2019 Jan 4;6:e5565. doi: 10.7717/peerj.5565 (PMC6322490; doi:10.7717/peerj.5565)
Supplement: Supplemental Information 4 — On each sheet, the matrix is reproduced in cells B1–JR103, the presence of a change of the kind in question marked by “1” while all other cells remain empty; the matrix is surrounded by sums and ranked lists with a few comments. On the sheet “green”, the changes caused by the removal of all postcranial scores from Rhynchonkos are not counted. See the introduction of App. S2 for more information. [file peerj-07-5565-s004.xlsx]

## Sheet: red
red in Appendix S2	1	2	3	4	5	6	7	8	9	10	11	12	13	14	15	16	17	18	19	20	21	22	23	24	25	26	27	28	29	30	31	32	33	34	35	36	37	38	39	40	41	42	43	44	45	46	47	48	49
Eusthenopteron
Panderichthys				1					1		1																					1
Ventastega		1		1	1	1		1	1			1	1	1	1	1	1									1	1	1	1	1		1	1	1		1	1		1	1	1	1	1	1	1	1	1
Acanthostega													1		1												1			1				1			1	1					1
Ichthyostega				1										1			1										1							1					1	1			1
Tulerpeton
Colosteus						1	1						1			1				1
Greererpeton						1	1										1
Crassigyrinus																			1								1														1
Whatcheeria						1
Baphetes													1																								1	1			1		1
Megalocephalus																															1												1
Eucritta														1											1															1
Edops	1			1			1																											1			1	1					1
Chenoprosopus
Cochleosaurus																					1													1
Isodectes																																								1
Neldasaurus																											1
Trimerorhachis											1									1							1	1									1	1					1				1
Balanerpeton														1													1										1	1			1
Dendrerpetidae																																		1						1	1		1
Eryops																																	1							1			1
Acheloma							1																																	1			1
Phonerpeton						1	1							1																										1
Ecolsonia																	1																	1						1
Broiliellus brevis																								1			1							1
Amphibamus					1						1						1					1												1						1
Doleserpeton							1																	1
Eoscopus							1										1																										1
Platyrhinops							1										1										1													1	1
Micromelerpeton																	1										1							1						1
Apateon																	1																	1						1
Leptorophus	1																1																							1
Schoenfelderpeton	1																1																							1
Albanerpetidae					1				1				1							1	1	1					1			1		1	1						1
Eocaecilia											1		1			1	1	1	1		1						1														1
Karaurus											1				1		1					1										1		1
Triadobatrachus												1	1		1							1	1									1		1		1
Valdotriton														1			1	1				1										1	1
Caerorhachis
Eoherpeton
Proterogyrinus																	1
Archeria
Ph. attheyi
Anthracosaurus
Ph. scutigerum																	1										1	1
Bruktererpeton																	1				1																		1	1					1
Gephyrostegus													1								1							1		1				1			1
Solenodonsaurus	1												1	1							1									1		1								1	1
Kotlassia	1							1	1		1			1					1	1			1										1					1			1
Discosauriscus											1			1																										1			1
Seymouria																																								1			1
Diadectes																																					1	1		1	1	1	1
Limnoscelis																														1								1		1		1	1
Captorhinus
Paleothyris	1																																			1
Petrolacosaurus
Westlothiana										1	1			1			1	1			1									1												1				1
Batropetes						1	1				1		1			1											1							1		1	1
Tuditanus										1																								1
Pantylus																											1
Stegotretus											1
Asaphestera											1																	1													1
Saxonerpeton											1																1							1						1
Hapsidopareion							1																											1			1	1
Micraroter							1									1	1
Pelodosotis																				1							1													1
Rhynchonkos							1															1					1							1
Cardiocephalus											1
Euryodus											1
Microbrachis									1											1																1				1
Hyloplesion									1								1																							1
Odonterpeton																												1				1						1	1
Brachydectes											1									1		1	1									1	1		1						1		1	1
Acherontiscus											1																					1
Adelospondylus	1								1		1								1						1							1
Adelogyrinus									1		1								1						1		1					1							1	1
Dolichopareias									1		1								1								1			1		1							1	1
Scincosaurus
Keraterpeton
Batrachiderpeton
Diceratosaurus																										1
Diplocaulus																	1									1
Diploceraspis																	1	1								1														1
Ptyonius																										1
Sauropleura																										1															1
Urocordylus	1																1
Lethiscus				1	1	1			1	1			1	1		1	1				1						1	1		1	1			1						1	1
Oestocephalus									1													1									1										1	1	1
Phlegethontia		1							1		1																	1		1		1		1			1
Ariekanerpeton														1																										1			1
Leptoropha	1								1																															1
Microphon	1															1																								1						1
Capetus																																									1		1
Notobatrachus																						1										1		1
Vieraella																						1										1		1
Orobates					1																																				1	1	1			1
Ossinodus	1				1														1	1		1					1				1	1									1		1
Pederpes	1
Silvanerpeton
Tseajaia														1						1																1					1		1
Utegenia
changes per character	12	2	0	5	6	7	12	2	13	3	20	2	11	13	4	7	24	4	7	9	8	11	3	2	3	6	22	8	1	10	4	17	6	23	1	6	11	10	7	32	19	6	22	2	2	4	2	0	0
[truncated: 235 more columns]

## Sheet: green
green in Appendix S2	1	2	3	4	5	6	7	8	9	10	11	12	13	14	15	16	17	18	19	20	21	22	23	24	25	26	27	28	29	30	31	32	33	34	35	36	37	38	39	40	41	42	43	44	45	46	47	48	49
Eusthenopteron	1		1					1																	1	1
Panderichthys	1		1					1																	1																							1
Ventastega	1		1																	1					1																							1
Acanthostega	1		1				1			1										1					1
Ichthyostega	1		1							1										1					1
Tulerpeton	1
Colosteus	1		1							1															1
Greererpeton	1		1							1						1									1
Crassigyrinus	1		1							1															1																							1
Whatcheeria	1									1															1
Baphetes	1		1							1							1		1	1					1
Megalocephalus	1		1							1						1	1		1	1					1
Eucritta	1		1							1									1	1
Edops			1																	1					1
Chenoprosopus	1		1							1						1				1					1
Cochleosaurus	1		1																	1					1
Isodectes	1		1							1									1						1
Neldasaurus	1		1													1									1
Trimerorhachis	1		1							1															1
Balanerpeton	1		1																						1
Dendrerpetidae	1		1							1															1																								1
Eryops	1		1							1										1					1
Acheloma	1		1																						1
Phonerpeton	1		1							1															1
Ecolsonia	1		1																						1
Broiliellus brevis			1							1															1
Amphibamus	1		1																						1
Doleserpeton	1		1																						1
Eoscopus	1		1				1			1															1													1
Platyrhinops	1		1				1																		1
Micromelerpeton	1		1							1									1	1					1
Apateon	1		1																						1
Leptorophus			1																						1
Schoenfelderpeton			1																						1
Albanerpetidae	1		1							1															1			1			1					1
Eocaecilia	1		1							1						1				1					1
Karaurus	1		1																1	1					1			1
Triadobatrachus																					1							1													1		1
Valdotriton	1		1													1									1			1
Caerorhachis	1		1							1															1
Eoherpeton	1		1							1										1					1																							1
Proterogyrinus	1		1							1															1
Archeria	1		1							1										1					1
Ph. attheyi	1		1							1						1				1					1
Anthracosaurus	1		1							1															1
Ph. scutigerum	1		1							1						1				1					1
Bruktererpeton	1		1							1															1
Gephyrostegus	1		1							1															1																							1
Solenodonsaurus			1							1															1
Kotlassia			1							1															1
Discosauriscus	1		1							1															1
Seymouria	1		1																						1
Diadectes	1		1							1															1
Limnoscelis	1		1							1															1
Captorhinus	1		1							1															1											1							1
Paleothyris			1							1															1
Petrolacosaurus	1		1							1															1
Westlothiana	1		1																						1
Batropetes	1		1							1															1						1										1		1
Tuditanus	1		1																						1						1
Pantylus	1		1							1															1						1
Stegotretus	1		1							1															1						1
Asaphestera	1		1							1															1						1
Saxonerpeton	1		1							1															1						1
Hapsidopareion	1		1							1															1						1
Micraroter	1		1							1															1						1
Pelodosotis	1		1							1															1						1
Rhynchonkos	1		1							1															1						1
Cardiocephalus	1		1							1															1						1
Euryodus	1		1							1															1						1
Microbrachis	1		1							1															1						1
Hyloplesion	1		1							1															1						1
Odonterpeton	1		1							1															1
Brachydectes	1		1							1											1				1			1			1
Acherontiscus										1															1
Adelospondylus																				1
Adelogyrinus	1									1										1
Dolichopareias	1									1										1					1
Scincosaurus	1		1																						1						1
Keraterpeton	1		1																						1						1
Batrachiderpeton	1		1							1															1						1
Diceratosaurus	1		1							1															1						1
Diplocaulus	1		1																	1					1						1
Diploceraspis	1		1																						1						1
Ptyonius	1		1							1															1
Sauropleura	1		1																						1
Urocordylus			1																						1
Lethiscus	1		1				1																		1																				1	1
Oestocephalus	1		1							1															1																				1	1
Phlegethontia	1		1				1			1															1																				1	1
Ariekanerpeton	1		1							1															1
Leptoropha																									1
Microphon			1							1															1
Capetus	1		1							1															1
Notobatrachus	1		1				1																		1			1								1
Vieraella	1		1																						1			1
Orobates	1		1							1															1
Ossinodus			1																						1																						1	1
Pederpes			1							1															1
Silvanerpeton	1		1							1															1
Tseajaia	1		1							1															1
Utegenia	1		1							1															1
changes per character	87	0	94	0	0	0	6	2	0	68	0	0	0	0	0	8	2	0	6	21	2	0	0	0	97	1	0	7	0	0	22	0	0	0	0	3	0	1	0	0	2	0	3	0	3	3	1	6	1
[truncated: 235 more columns]

## Sheet: blue
blue in Appendix S2	1	2	3	4	5	6	7	8	9	10	11	12	13	14	15	16	17	18	19	20	21	22	23	24	25	26	27	28	29	30	31	32	33	34	35	36	37	38	39	40	41	42	43	44	45	46	47	48	49
Eusthenopteron
Panderichthys
Ventastega
Acanthostega
Ichthyostega
Tulerpeton
Colosteus
Greererpeton
Crassigyrinus
Whatcheeria
Baphetes
Megalocephalus
Eucritta
Edops
Chenoprosopus
Cochleosaurus
Isodectes
Neldasaurus
Trimerorhachis
Balanerpeton
Dendrerpetidae
Eryops
Acheloma
Phonerpeton
Ecolsonia
Broiliellus brevis
Amphibamus
Doleserpeton
Eoscopus
Platyrhinops
Micromelerpeton														1
Apateon																						1															1
Leptorophus																											1
Schoenfelderpeton																						1	1				1
Albanerpetidae
Eocaecilia
Karaurus
Triadobatrachus
Valdotriton
Caerorhachis
Eoherpeton
Proterogyrinus
Archeria
Ph. attheyi
Anthracosaurus
Ph. scutigerum
Bruktererpeton
Gephyrostegus
Solenodonsaurus
Kotlassia
Discosauriscus
Seymouria
Diadectes
Limnoscelis
Captorhinus
Paleothyris
Petrolacosaurus
Westlothiana
Batropetes
Tuditanus
Pantylus
Stegotretus
Asaphestera
Saxonerpeton
Hapsidopareion
Micraroter
Pelodosotis
Rhynchonkos
Cardiocephalus
Euryodus
Microbrachis
Hyloplesion
Odonterpeton
Brachydectes
Acherontiscus
Adelospondylus
Adelogyrinus
Dolichopareias
Scincosaurus
Keraterpeton
Batrachiderpeton
Diceratosaurus
Diplocaulus
Diploceraspis
Ptyonius
Sauropleura
Urocordylus
Lethiscus
Oestocephalus
Phlegethontia
Ariekanerpeton
Leptoropha																																											1
Microphon																																											1
Capetus
Notobatrachus
Vieraella
Orobates
Ossinodus
Pederpes
Silvanerpeton
Tseajaia
Utegenia
changes per character	0	0	0	0	0	0	0	0	0	0	0	0	0	1	0	0	0	0	0	0	0	2	1	0	0	0	2	0	0	0	0	0	0	0	0	0	1	0	0	0	0	0	2	0	0	0	0	0	0
Chroniosaurus	205
Micropholis	205
Tungussogyrinus	22, 23
Utaherpeton	219, 250
Acanthostomatops	42
Karpinskiosaurus	69, 184
Carrolla	134
Sclerocephalus	197
Cheliderpeton	46, 90
Beiyanerpeton	183, 189
Mordex	226
Branchiosaurus	68, 226
[truncated: 238 more columns]
