# Supplementary material for: Phylogeny of Paleozoic limbed vertebrates reassessed through revision and expansion of the largest published relevant data matrix
Source: PeerJ. 2019 Jan 4;6:e5565. doi: 10.7717/peerj.5565 (PMC6322490; doi:10.7717/peerj.5565)
Supplement: Supplemental Information 5 — On the sheet “Data”, the OTUs are listed such that the line numbers are the same as the numbers the OTUs have in the matrix; OTUs that cannot be measured for any of the parameters are represented by blank lines. Calculations are underlain in yellow or blue. The raw measurements, in cm, will mostly be difficult to reproduce: they were taken from illustrations (we preferred reconstruction drawings to avoid the effects of diagenetic distortion) on paper or on a screen, in the latter cases usually but not always at a magnification such as 150%, 200% or 300%. The ratios, however, should be fairly well reproducible. Column B is the distance (at a right angle to the sagittal plane) between the lateral extremities of the premaxillae, measured in ventral view when the premaxillae are insufficiently exposed in dorsal view. Column C is the maximum width of the dermatocranium in dorsal view. Column D is the maximum width of the skull table; when sharp edges between the table and the temporal regions are absent or unknown, this can be measured across the “tabular horns,” across the supratemporals across the rostral ends of the temporal notches, or across the intertemporals, whichever is widest. When possible, we have consulted lateral views to determine where the dorsal and the lateral surfaces of the skull roof meet. Column E cites our sources (all of them are also cited in App. S1 and therefore listed in its References section). Column G is the ratio of premaxillary width to skull roof width (B divided by C), which we decided to use as the raw data for PREMAX 7 (App.-Table 1 under ch. 3 in App. S1). Column H is the ratio of premaxillary width to skull table width (B/D). Column I is the postorbital skull table length, in other words the rostrocaudal distance between the caudal margins of the orbits or orbitotemporal fenestrae (averaged if necessary) and the caudal end of the skull table in the midline. In salientians, the rostral margin of the otic capsule was assumed to lie at [file peerj-07-5565-s005.xlsx]

## Sheet: Data
Eusthenopteron	0.6	2.05	1.3	Clack, 2007		0.292683	0.461538	1.15	1.5	1.36667	1.13043	1.78261	0.866667
Panderichthys	2.2	5.4	3.2	Long & Gordon, 2004, after Vorobyeva & Schultze, 1991		0.407407	0.6875	2.9	3.3	1.63636	1.10345	1.86207	0.969697
Ventastega	3.95	6.95	3.1	Ahlberg et al., 2008		0.568345	1.27419	3.1	5.1	1.36275	1	2.24194	0.607843
Acanthostega	7	19	10.4	Porro, Rayfield & Clack, 2015		0.368421	0.673077	7.1	10.3	1.84466	1.46479	2.67606	1.00971
Ichthyostega	1.05	2.6	3	Clack & Milner, 2015: fig. 8		0.403846	0.35	1.8		#DIV/0!	1.66667	1.44444	#DIV/0!
Colosteus	5.35	16.6	11.9	Hook, 1983		0.322289	0.44958	12.1	13.05	1.27203	0.983471	1.3719	0.911877
Greererpeton	4.4	10.95	7.3	Smithson, 1982		0.401826	0.60274	6.8	7.9	1.38608	1.07353	1.61029	0.924051
Crassigyrinus	4.65	7.5	3.45	Clack, 1998		0.62	1.34783	3.2	7.2	1.04167	1.07812	2.34375	0.479167
Whatcheeria	3.1		4.6	Lombard & Bolt, 1995: fig. 1A (pmx estimated)			0.673913	2.9	4.2		1.58621		1.09524
Baphetes kirkbyi	6.2	13.05	5.1	Beaumont, 1977: fig. 21		0.475096	1.21569	4.4	6.7	1.94776	1.15909	2.96591	0.761194
Megalocephalus	4.45	12.3	4.55	Beaumont, 1977: fig. 8		0.361789	0.978022	3.1	5.8	2.12069	1.46774	3.96774	0.784483
Eucritta	3.1	6.95	2.4	Clack, 2001: fig. 8		0.446043	1.29167	2	3	2.31667	1.2	3.475	0.8
Edops	8.4	17.1	7.15	Schoch & Milner, 2014: fig. 13A		0.491228	1.17483	4.9	9.1	1.87912	1.45918	3.4898	0.785714
Chenoprosopus	7.4	15.3	10.3	Schoch & Milner, 2014: fig. 13E		0.48366	0.718447	8.8	10.3	1.48544	1.17045	1.73864	1
Cochleosaurus	8.4	15.1	10.2	Schoch & Milner, 2014: fig. 13D		0.556291	0.823529	7.35	7.55	2	1.38776	2.05442	1.35099
Isodectes	6.8	18.65	12.75	Schoch & Milner, 2014: fig. 20E		0.364611	0.533333	11.7	11.7	1.59402	1.08974	1.59402	1.08974
Neldasaurus	4.1	16.15	8.85	Schoch & Milner, 2014: fig. 20C		0.25387	0.463277	9.7	11.5	1.40435	0.912371	1.66495	0.769565
Trimerorhachis	7.7	18.05	10.3	Schoch & Milner, 2014: fig. 20A		0.426593	0.747573	8.65	9.3	1.94086	1.19075	2.08671	1.10753
Balanerpeton	6.7	14.5	8.6	Schoch & Milner, 2014: fig. 17A		0.462069	0.77907	5.9	7.4	1.95946	1.45763	2.45763	1.16216
Dendrysekos	7.65	14.35	10.7	Schoch & Milner, 2014: fig. 17C		0.533101	0.714953	7.3	9.2	1.55978	1.46575	1.96575	1.16304
Eryops	9.15	17.1	7.15	Schoch & Milner, 2014: fig. 3C		0.535088	1.27972	3.3	7.15	2.39161	2.16667	5.18182	1
Acheloma	4.35	12.5	9.7	Polley & Reisz, 2011		0.348	0.448454	4.05	6.4	1.95312	2.39506	3.08642	1.51562
Phonerpeton	2.25	6	4	Dilkes, 1990: fig. 1		0.375	0.5625	2.25	3.1	1.93548	1.77778	2.66667	1.29032
Ecolsonia	6.4	18.6	14.7	Berman, Reisz & Eberth, 1985: fig. 5A		0.344086	0.435374	6.2	9.3	2	2.37097	3	1.58065
Broiliellus	1.85	5.65	4.1	Carroll, 1964		0.327434	0.45122	2	2.9	1.94828	2.05	2.825	1.41379
Amphibamus	7.9	17.1	9.4	Schoch & Milner, 2014: fig. 30		0.461988	0.840426	4.85	8.6	1.98837	1.93814	3.52577	1.09302
Doleserpeton	6.5	15.1	9.2	Sigurdsen & Bolt, 2010		0.430464	0.706522	4.5	6.5	2.32308	2.04444	3.35556	1.41538
Eoscopus	3.8	8.8	4.9	Daly, 1994: fig. 3		0.431818	0.77551	2.3	3.7	2.37838	2.13043	3.82609	1.32432
Platyrhinops	3.2	7.85	4.2	Clack & Milner, 2010: fig. 9		0.407643	0.761905	1.7	3.6	2.18056	2.47059	4.61765	1.16667
Micromelerpeton	5.7	16.7	9	Boy, 1995: fig. 8A		0.341317	0.633333	6	7.9	2.11392	1.5	2.78333	1.13924
Apateon	4.8	11.5	7.15	Schoch & Fröbisch, 2006: fig. 1D		0.417391	0.671329	2.5	3.9	2.94872	2.86	4.6	1.83333
Leptorophus	3.4	11.4	6.9	Boy, 1986: fig. 4		0.298246	0.492754	3.2	3.9	2.92308	2.15625	3.5625	1.76923
Schoenfelderpeton	3.7	11.4	8.6	Boy, 1986: fig. 13		0.324561	0.430233	4.2	4.2	2.71429	2.04762	2.71429	2.04762
Celtedens	6.2	13	9.9	McGowan, 2002		0.476923	0.626263	7	8.5	1.52941	1.41429	1.85714	1.16471
Eocaecilia	6.95	18	8.95	Jenkins, Walsh & Carroll, 2007		0.386111	0.776536	12.5	12.5	1.44	0.716	1.44	0.716
Karaurus	4.8	9.45	7	Ivachnenko, 1978		0.507937	0.685714	3	3	3.15	2.33333	3.15	2.33333
Triadobatrachus		21	10.8	Roček & Rage, 2000: fig. 2 left; right roof width doubled, because left side disarticulated				2.9	4.5	4.66667	3.72414	7.24138	2.4
Valdotriton	6.1	16.2	6.5	Evans & Milner, 1996		0.376543	0.938462	3.8	4.9	3.30612	1.71053	4.26316	1.32653
Caerorhachis	3.55	5.15	4.05	Ruta, Milner & Coates, 2002		0.68932	0.876543	3.1	3.4	1.51471	1.30645	1.66129	1.19118
Eoherpeton	3	9.2	6.8	Panchen, 1975		0.326087	0.441176	3.5	5.7	1.61404	1.94286	2.62857	1.19298
Proterogyrinus	1.3	4.7	3	Holmes, 1984		0.276596	0.433333	2.3	3.9	1.20513	1.30435	2.04348	0.769231
Archeria	1.7	7.5	4.75	Holmes, 1989		0.226667	0.357895	2.5	4.2	1.78571	1.9	3	1.13095
Ph. attheyi	5.3	17.7	7	Panchen, 1972		0.299435	0.757143	5.7	10.2	1.73529	1.22807	3.10526	0.686275
Anthracosaurus	6.1	19	10.15	Clack, 1987a		0.321053	0.600985	4.25	11.7	1.62393	2.38824	4.47059	0.867521
Ph. scutigerum	2.1	7.75	3.5	Clack, 1987b		0.270968	0.6	2.6	4.4	1.76136	1.34615	2.98077	0.795455
Bruktererpeton	1.5	6.1	3.5	Boy & Bandel, 1973: fig. 7 (roof reconstructed, pmx guessed)		0.245902	0.428571	2.4	3	2.03333	1.45833	2.54167	1.16667
Gephyrostegus	3.2	8.9	5.65	Klembara et al., 2014		0.359551	0.566372	3.5	5.6	1.58929	1.61429	2.54286	1.00893
Solenodonsaurus	6.5	19.15	10.45	Danto, Witzmann & Müller, 2012 (pmx is a maximum!)		0.339426	0.62201	5.3	9.45	2.02646	1.9717	3.61321	1.10582
Kotlassia	1.1	5.1	3.7	Bulanov, 2003: fig. 30		0.215686	0.297297	2.4	2.5	2.04	1.54167	2.125	1.48
Discosauriscus	3.9	13.05	10.5	Klembara et al., 2006		0.298851	0.371429	5.9	6.8	1.91912	1.77966	2.21186	1.54412
Seymouria	5.2	16.4	12.2	Laurin, 1996c		0.317073	0.42623	6.5	8	2.05	1.87692	2.52308	1.525
Diadectes	6.5	16.9	15.7	Kissel, 2010: fig. 36B		0.384615	0.414013	2.5	7.9	2.13924	6.28	6.76	1.98734
Limnoscelis	5.6	18.8	13.95	Kissel, 2010: fig. 13A		0.297872	0.401434	5.9	8.85	2.12429	2.36441	3.18644	1.57627
Captorhinus	2.1	7.9	2.9	Fox & Bowman, 1966: fig. 3		0.265823	0.724138	3.2	3.9	2.02564	0.90625	2.46875	0.74359
Paleothyris	0.75	2.4	1.2	Carroll, 1969a: fig. 4B		0.3125	0.625	1.1	1.45	1.65517	1.09091	2.18182	0.827586
Petrolacosaurus	3.2	13.45	9.4	Berman, Sumida & Lombard, 1992: fig. 11		0.237918	0.340426	4.3	6	2.24167	2.18605	3.12791	1.56667
Westlothiana	1.9	5.2	3.6	Smithson et al., 1994		0.365385	0.527778	2.4	3	1.73333	1.5	2.16667	1.2
Batropetes	4.6	15.8	13.45	Glienke, 2013: fig. 2		0.291139	0.342007	5.5	5.5	2.87273	2.44545	2.87273	2.44545
Tuditanus	1.25	5.2	5.2	Carroll & Baird, 1968: fig. 9		0.240385	0.240385	1.8	2.8	1.85714	2.88889	2.88889	1.85714
Pantylus	1.5	10.1	7.3	Romer, 1969: fig. 1		0.148515	0.205479	5.7	5.7	1.77193	1.2807	1.77193	1.2807
Stegotretus	1.9	7	5	Berman, Eberth & Brinkman, 1988: fig. 10B		0.271429	0.38	3	3.6	1.94444	1.66667	2.33333	1.38889
Asaphestera	2.4	6.7	5	CG78: fig. 7		0.358209	0.48	2.15	2.7	2.48148	2.32558	3.11628	1.85185
Saxonerpeton	1.7	4.3	4.2	CG78: fig. 22		0.395349	0.404762	1.7	2.3	1.86957	2.47059	2.52941	1.82609
Micraroter	3.5	11.2	8.1	CG78: fig. 56		0.3125	0.432099	3.7	4.6	2.43478	2.18919	3.02703	1.76087
Pelodosotis	2.8	9.2	6.4	CG78: fig. 48		0.304348	0.4375	3.5	4.35	2.11494	1.82857	2.62857	1.47126
Rhynchonkos	3	9.1	7.3	CG78: fig. 63		0.32967	0.410959	4	4	2.275	1.825	2.275	1.825
Cardiocephalus	2	8.5	7	CG78: fig. 69		0.235294	0.285714	5.7	5.7	1.49123	1.22807	1.49123	1.22807
Euryodus	2.8	9.2	7.5	CG78: fig. 37		0.304348	0.373333	6.7	6.85	1.34307	1.1194	1.37313	1.09489
Microbrachis	2.1	7.2	6.25	Vallin & Laurin, 2004		0.291667	0.336	3.7	4.2	1.71429	1.68919	1.94595	1.4881
Hyloplesion	1.75	6.45	5	CG78: fig. 89B		0.271318	0.35	3	3.25	1.98462	1.66667	2.15	1.53846
Odonterpeton	1.1	5.85	3	CG78: fig. 99B		0.188034	0.366667	4.3	4.3	1.36047	0.697674	1.36047	0.697674
Brachydectes	16.45	21.1	16.8	Pardo & Anderson, 2016: fig. 4B		0.779621	0.979167	8.55	11	1.91818	1.96491	2.46784	1.52727
Adelospondylus		7.1	5.2	Andrews & Carroll, 1991				6.1	6.1	1.16393	0.852459	1.16393	0.852459
Adelogyrinus		6.2	3.5	Andrews & Carroll, 1991				4.7	4.7	1.31915	0.744681	1.31915	0.744681
Scincosaurus	4.8	16.6	14.8	Milner & Ruta, 2009		0.289157	0.324324	7.3	8	2.075	2.0274	2.27397	1.85
Keraterpeton	0.8	2.55	2.55	Bossy & Milner, 1998		0.313725	0.313725	1.65	1.65	1.54545	1.54545	1.54545	1.54545
Batrachiderpeton	1.25	8.15	8.15	Bossy & Milner, 1998		0.153374	0.153374	3.4	6.3	1.29365	2.39706	2.39706	1.29365
Diceratosaurus	0.85	3.4	3.4	Bossy & Milner, 1998		0.25	0.25	1.65	1.65	2.06061	2.06061	2.06061	2.06061
Diplocaulus	1	11	11	Olson, 1951: pl. 5B left side doubled		0.0909091	0.0909091	2.1	2.1	5.2381	5.2381	5.2381	5.2381
Diploceraspis	1.2	15.5	15.5	Beerbower, 1963: fig. 2		0.0774194	0.0774194	2.65	2.65	5.84906	5.84906	5.84906	5.84906
Ptyonius	3.3	7.4	5.4	Bossy & Milner, 1998		0.445946	0.611111	4.5	4.5	1.64444	1.2	1.64444	1.2
Sauropleura scalaris	2.2	7.2	3.6	Bossy & Milner, 1998		0.305556	0.611111	5.1	5.5	1.30909	0.705882	1.41176	0.654545
Urocordylus	1.1	4.2	2.6	Bossy & Milner, 1998		0.261905	0.423077	2.6	2.6	1.61538	1	1.61538	1
Lethiscus	4.3	10.7	6.1	Pardo, pers. comm.		0.401869	0.704918	7.3		#DIV/0!	0.835616	1.46575	#DIV/0!
Oestocephalus	1.1	3.6	3	Anderson, 2003b		0.305556	0.366667	4.1	4.35	0.827586	0.731707	0.878049	0.689655
Phlegethontia	2.05	3.6	1.5	Anderson, 2007a		0.569444	1.36667	2.3	2.3	1.56522	0.652174	1.56522	0.652174
Ariekanerpeton	3.45	12.75	8.9	Klembara & Ruta, 2005a		0.270588	0.38764	4.8	4.8	2.65625	1.85417	2.65625	1.85417
Leptoropha				too immature: Bulanov, 2003
Microphon	1.9	5.8	4.5	Bulanov, 2003: fig. 22		0.327586	0.422222	2.05	2.05	2.82927	2.19512	2.82927	2.19512
Capetus	3.45	7.2	3.3	Sequeira & Milner, 1993		0.479167	1.04545	2.2	3.1	2.32258	1.5	3.27273	1.06452
Notobatrachus	2.9	11.5	2.6	Báez & Nicoli, 2004		0.252174	1.11538	3.2	3.2	3.59375	0.8125	3.59375	0.8125
Vieraella	2.2	5	2.55	Báez & Basso, 1996: fig. 6, 7		0.44	0.862745	1.6	1.6	3.125	1.59375	3.125	1.59375
Orobates	7.5	16	12.55	Kissel, 2010: fig. 32B		0.46875	0.59761	6	9	1.77778	2.09167	2.66667	1.39444
Ossinodus	2.1	6.8	3.75	Warren, 2007		0.308824	0.56	2.2	4.3	1.5814	1.70455	3.09091	0.872093
Pederpes	2.1	7.05	3.85	Clack & Finney, 2005		0.297872	0.545455	2.3	3.6	1.95833	1.67391	3.06522	1.06944
Silvanerpeton	2.8	8.4	4.3	Ruta & Clack, 2006		0.333333	0.651163	3.2	4.5	1.86667	1.34375	2.625	0.955556
Tseajaia	4.1	16.75	12.2	Berman, Sumida & Lombard, 1992: fig. 11		0.244776	0.336066	4.1	6.3	2.65873	2.97561	4.08537	1.93651
Utegenia	3.1	12.4	8.8	Klembara & Ruta, 2004a		0.25	0.352273	3.35	5.6	2.21429	2.62687	3.70149	1.57143
Gerobatrachus	6.7	18.1	9.3	estimates based on Anderson et al., 2008: fig. 2b		0.370166	0.72043	3.5	3.5	5.17143	2.65714	5.17143	2.65714
Chroniosaurus	2.95	8.8	4.3	Clack & Klembara, 2009		0.335227	0.686047	3.8	5.8	1.51724	1.13158	2.31579	0.741379
Micropholis	7	15.8	9.8	Schoch & Rubidge, 2005: fig. 3B		0.443038	0.714286	5.6	9	1.75556	1.75	2.82143	1.08889
Nigerpeton	7.2	17.2	6.55	Steyer et al., 2006		0.418605	1.09924	3.1	5.05	3.40594	2.1129	5.54839	1.29703
Saharastega			20	D. M., pers. obs.		#DIV/0!	0	9.5	8.25	0	2.10526	0	2.42424
Iberospondylus	15.2	37	15	Laurin & Soler-Gijón, 2006: fig. 1A left side approximately doubled		0.410811	1.01333	8.9	16.05	2.3053	1.68539	4.1573	0.934579
Tungussogyrinus	5.6	18.4	12.3	Werneburg, 2009		0.304348	0.455285	4.4	4.4	4.18182	2.79545	4.18182	2.79545
Utaherpeton	1.25	4.6	3	Carroll, Bybee & Tidwell, 1991		0.271739	0.416667	2.7	2.7	1.7037	1.11111	1.7037	1.11111
Eothyris	4.2	14.5	10.55	Reisz, Godfrey & Scott, 2009		0.289655	0.398104	4.4	8.2	1.76829	2.39773	3.29545	1.28659
Sparodus	1.1	5.7	2.4	Carroll, 1988		0.192982	0.458333	2.9	2.9	1.96552	0.827586	1.96552	0.827586
Liaobatrachus	4.1	11.4	3.1	Dong et al., 2013		0.359649	1.32258	1	1.3	8.76923	3.1	11.4	2.38462
Acanthostomatops	6	14.1	5.6	Witzmann & Schoch, 2006a		0.425532	1.07143	2.4	2.4	5.875	2.33333	5.875	2.33333
Deltaherpeton	4	10.8	5.2	Bolt & Lombard, 2010: fig. 2 left pmx doubled, otherwise right side approximately doubled		0.37037	0.769231	4.7	4.9	2.20408	1.10638	2.29787	1.06122
Karpinskiosaurus	4.6	19.15	15.05	Klembara, 2011		0.240209	0.305648	7.45	8.7	2.20115	2.02013	2.57047	1.72989
Carrolla	2.45	6.9	4.1	Maddin, Olori & Anderson, 2011		0.355072	0.597561	1.6	1.8	3.83333	2.5625	4.3125	2.27778
cf. Calligenethlon		7	4.8	Homes & Carroll, 2010				2.5	4.7	1.48936	1.92	2.8	1.02128
Crinodon	3.7	13.8	11.9	CG78: fig. 11		0.268116	0.310924	3.4	5.2	2.65385	3.5	4.05882	2.28846
Spathicephalus	6.55	12.05	4.3	Beaumont & Smithson, 1998: fig. 5		0.543568	1.52326	1.5	2.7	4.46296	2.86667	8.03333	1.59259
Sclerocephalus	5.1	11.45	5.5	Schoch & Witzmann, 2009a		0.445415	0.927273	4.05	6.3	1.81746	1.35802	2.82716	0.873016
Cheliderpeton	6.7	18.3	8.2	Werneburg & Steyer, 2002		0.36612	0.817073	7.1	9.15	2	1.15493	2.57746	0.896175
Archegosaurus	5.35	18.5	8.8	Witzmann, 2006: fig. 5		0.289189	0.607955	7.6	10.95	1.6895	1.15789	2.43421	0.803653
Konzhukovia	5.6	11.7	6.2	Gubin, 1991: fig. 6a		0.478632	0.903226	4.6	7.1	1.64789	1.34783	2.54348	0.873239
Lydekkerina	6.2	19.4	11.85	Hewison, 2007: fig. 30		0.319588	0.523207	7.25	8.25	2.35152	1.63448	2.67586	1.43636
Beiyanerpeton				dorsal view is photographed at an odd angle: Gao & Shubin 2012: fig. 3 top
Pangerpeton	5.6	16.2	5	estimates from ventral view: Wang & Evans, 2006		0.345679	1.12		3.9	4.15385			1.28205
Chelotriton	3.5	15.5	10	drawing of MB.Am.45.3 (Marjanović & Witzmann, forthcoming: fig. 7)		0.225806	0.35	2.8	7.4	2.09459	3.57143	5.53571	1.35135
Palatinerpeton	6.3	15.8	7.3	Boy, 1996: fig. 3		0.398734	0.863014	5.2	6.7	2.35821	1.40385	3.03846	1.08955
Glanochthon	10.9	27.8	10.2	Schoch & Witzmann, 2009b: fig. 2A approximately doubled		0.392086	1.06863	8.4	14.3	1.94406	1.21429	3.30952	0.713287
Archaeovenator	1.8		8	Reisz & Dilkes, 2003			0.225	2.7	5.8		2.96296		1.37931
Platyoposaurus	2.2	11.4	6.1	Gubin, 1991: fig. 3a		0.192982	0.360656	4.3	7	1.62857	1.4186	2.65116	0.871429
Erpetosaurus	9.2	17	10.9	Milner & Sequeira, 2011		0.541176	0.844037	15.05	17.7	0.960452	0.724252	1.12957	0.615819
Mordex	6.85	15.4	9.95	Schoch & Milner, 2014: fig. 32A		0.444805	0.688442	6.2	6.7	2.29851	1.60484	2.48387	1.48507
Pholidogaster	5.7	12.6	7.5	Panchen, 1975		0.452381	0.76	6.9	7.3	1.72603	1.08696	1.82609	1.0274
Palaeoherpeton	2.6	8.5	4.35	Panchen, 1964		0.305882	0.597701	2.9	5.4	1.57407	1.5	2.93103	0.805556
Neopteroplax	3.4	15.3	5.6	Romer, 1963: fig. 3		0.222222	0.607143	4.1	6.5	2.35385	1.36585	3.73171	0.861538
Australerpeton	3.55	15.6	8.2	Eltink et al., 2016: fig. 5		0.227564	0.432927	6.8		#DIV/0!	1.20588	2.29412	#DIV/0!
Quasicaecilia		20	17.9	Pardo, Szostakiwskyj & Anderson, 2015				4.7	5	4	3.80851	4.25532	3.58
Llistrofus	7.6	16.65	8.5	Bolt & Rieppel, 2009		0.456456	0.894118	16.5	16.7	0.997006	0.515152	1.00909	0.508982
Bystrowiella	3.9	19.2	8	Witzmann & Schoch, 2017: fig. 15C		0.203125	0.4875	3.9		#DIV/0!	2.05128	4.92308	#DIV/0!
Coloraderpeton			1.2	Anderson, 2003a: fig. 3A		#DIV/0!	0	5.2		#DIV/0!	0.230769	0	#DIV/0!
Pseudophlegethontia	1	4.3	3	Anderson, 2003b: fig. 3		0.232558	0.333333	5		#DIV/0!	0.6	0.86	#DIV/0!
	pmx width	roof width	table width	source		pmx/roof	pmx/table	po table length	po roof length	roof	table	roof width/table length	table width/roof length
Sauropleura pectinata	1.9	5.1	2.8	Bossy & Milner, 1998		0.372549	0.678571	4	4.5	1.13333	0.7
Baphetes orientalis	4.9	8.9		Beaumont, 1977: fig. 25		0.550562	#DIV/0!			#DIV/0!	#DIV/0!

## Sheet: pmx-roof
Brachydectes	0.779621	0
Caerorhachis	0.68932	0
Crassigyrinus	0.62	0
Phlegethontia	0.569444	0
Ventastega	0.568345	0
Cochleosaurus	0.556291	0
Spathicephalus	0.543568	0
Erpetosaurus	0.541176	0
Eryops	0.535088	0
Dendrysekos	0.533101	0
Karaurus	0.507937	0
Edops	0.491228	1
Chenoprosopus	0.48366	1
Capetus	0.479167	1
Konzhukovia	0.478632	1
Celtedens	0.476923	1
Orobates	0.46875	1
Balanerpeton	0.462069	1
Amphibamus	0.461988	1
Llistrofus	0.456456	1
Pholidogaster	0.452381	1
Eucritta	0.446043	1
Ptyonius	0.445946	1
Sclerocephalus	0.445415	1
Mordex	0.444805	1
Micropholis	0.443038	1
Vieraella	0.44	1
Eoscopus	0.431818	1
Doleserpeton	0.430464	1
Trimerorhachis	0.426593	1
Acanthostomatops	0.425532	1
Nigerpeton	0.418605	1
Apateon	0.417391	1
Iberospondylus	0.410811	1
Platyrhinops	0.407643	1
Panderichthys	0.407407	1
Greererpeton	0.401826	1
Lethiscus	0.401869	1
Ichthyostega	0.403846	1
Palatinerpeton	0.398734	2
Saxonerpeton	0.395349	2
Glanochthon	0.392086	2
Eocaecilia	0.386111	2
Diadectes	0.384615	2
Valdotriton	0.376543	2
Phonerpeton	0.375	2
Deltaherpeton	0.37037	2
Gerobatrachus	0.370166	2
Acanthostega	0.368421	2
Cheliderpeton	0.36612	2
Westlothiana	0.365385	2
Isodectes	0.364611	2
Megalocephalus	0.361789	2
Liaobatrachus	0.359649	2
Gephyrostegus	0.359551	2
Asaphestera	0.358209	2
Carrolla	0.355072	2
Acheloma	0.348	2
Pangerpeton	0.345679	2
Ecolsonia	0.344086	2
Micromelerpeton	0.341317	2
Solenodonsaurus	0.339426	2
Saharastega	0.338798	2
Chroniosaurus	0.335227	2
Silvanerpeton	0.333333	2
Rhynchonkos	0.32967	2
Microphon	0.327586	2
Broiliellus	0.327434	2
Eoherpeton	0.326087	2
Schoenfelderpeton	0.324561	2
Colosteus	0.322289	2
Anthracosaurus	0.321053	2
Lydekkerina	0.319588	2
Seymouria	0.317073	2
Keraterpeton	0.313725	2
Paleothyris	0.3125	2
Micraroter	0.3125	2
Ossinodus	0.308824	2
Palaeoherpeton	0.305882	2
Sauropleura scalaris	0.305556	2
Oestocephalus	0.305556	2
Pelodosotis	0.304348	2
Euryodus	0.304348	2
Tungussogyrinus	0.304348	2
Ph. attheyi	0.299435	3
Discosauriscus	0.298851	3
Leptorophus	0.298246	3
Pederpes	0.297872	3
Limnoscelis	0.297872	3
Eusthenopteron	0.292683	3
Microbrachis	0.291667	3
Batropetes	0.291139	3
Eothyris	0.289655	3
Archegosaurus	0.289189	3
Scincosaurus	0.289157	3
Proterogyrinus	0.276596	3
Utaherpeton	0.271739	3
Stegotretus	0.271429	3
Hyloplesion	0.271318	3
Ph. scutigerum	0.270968	3
Ariekanerpeton	0.270588	3
Crinodon	0.268116	3
Captorhinus	0.265823	3
Urocordylus	0.261905	3
Neldasaurus	0.25387	3
Notobatrachus	0.252174	3
Diceratosaurus	0.25	3
Utegenia	0.25	3
Bruktererpeton	0.245902	3
Tseajaia	0.244776	3
Tuditanus	0.240385	3
Karpinskiosaurus	0.240209	3
Petrolacosaurus	0.237918	3
Cardiocephalus	0.235294	3
Pseudophlegethontia	0.232558	3
Australerpeton	0.227564	3
Archeria	0.226667	3
Chelotriton	0.225806	3
Neopteroplax	0.222222	3
Kotlassia	0.215686	3
Bystrowiella	0.203125	3
Sparodus	0.192982	4
Platyoposaurus	0.192982	4
Odonterpeton	0.188034	4
Batrachiderpeton	0.153374	4
Pantylus	0.148515	4
Diplocaulus	0.0909091	4
Diploceraspis	0.0774194	4

## Sheet: pmx-table
Spathicephalus	1.52326
Phlegethontia	1.36667
Crassigyrinus	1.34783
Liaobatrachus	1.32258
Eucritta	1.29167
Eryops	1.27972
Ventastega	1.27419
Baphetes	1.21569
Edops	1.17483
Pangerpeton	1.12
Notobatrachus	1.11538
Nigerpeton	1.09924
Acanthostomatops	1.07143
Glanochthon	1.06863
Capetus	1.04545
Iberospondylus	1.01333
Megalocephalus	0.978022
Valdotriton	0.938462
Sclerocephalus	0.927273
Konzhukovia	0.903226
Llistrofus	0.894118
Caerorhachis	0.876543
Palatinerpeton	0.863014
Vieraella	0.862745
Erpetosaurus	0.844037
Amphibamus	0.840426
Cochleosaurus	0.823529
Cheliderpeton	0.817073
Ichthyostega	0.794118
Balanerpeton	0.77907
Eocaecilia	0.776536
Eoscopus	0.77551
Deltaherpeton	0.769231
Platyrhinops	0.761905
Pholidogaster	0.76
Ph. attheyi	0.757143
Trimerorhachis	0.747573
Captorhinus	0.724138
Gerobatrachus	0.72043
Chenoprosopus	0.718447
Dendrysekos	0.714953
Micropholis	0.714286
Doleserpeton	0.706522
Mordex	0.688442
Panderichthys	0.6875
Chroniosaurus	0.686047
Karaurus	0.685714
Whatcheeria	0.673913
Acanthostega	0.673077
Apateon	0.671329
Silvanerpeton	0.651163
Micromelerpeton	0.633333
Celtedens	0.626263
Paleothyris	0.625
Solenodonsaurus	0.62201
Sauropleura scalaris	0.611111
Ptyonius	0.611111
Archegosaurus	0.607955
Neopteroplax	0.607143
Greererpeton	0.60274
Anthracosaurus	0.600985
Ph. scutigerum	0.6
Palaeoherpeton	0.597701
Orobates	0.59761
Carrolla	0.597561
Gephyrostegus	0.566372
Phonerpeton	0.5625
Ossinodus	0.56
Pederpes	0.545455
Isodectes	0.533333
Westlothiana	0.527778
Brachydectes	0.979167
Lydekkerina	0.523207
Leptorophus	0.492754
Asaphestera	0.48
Neldasaurus	0.463277
Eusthenopteron	0.461538
Sparodus	0.458333
Tungussogyrinus	0.455285
Broiliellus	0.45122
Colosteus	0.44958
Acheloma	0.448454
Eoherpeton	0.441176
Australerpeton	0.43956
Pelodosotis	0.4375
Ecolsonia	0.435374
Proterogyrinus	0.433333
Micraroter	0.432099
Saharastega	0.430556
Schoenfelderpeton	0.430233
Bruktererpeton	0.428571
Seymouria	0.42623
Urocordylus	0.423077
Microphon	0.422222
Utaherpeton	0.416667
Diadectes	0.414013
Rhynchonkos	0.410959
Saxonerpeton	0.404762
Limnoscelis	0.401434
Eothyris	0.398104
Ariekanerpeton	0.38764
Stegotretus	0.38
Euryodus	0.373333
Discosauriscus	0.371429
Odonterpeton	0.366667
Oestocephalus	0.366667
Platyoposaurus	0.360656
Archeria	0.357895
Utegenia	0.352273
Hyloplesion	0.35
Chelotriton	0.35
Batropetes	0.342007
Petrolacosaurus	0.340426
Tseajaia	0.336066
Microbrachis	0.336
Scincosaurus	0.324324
Keraterpeton	0.313725
Crinodon	0.310924
Karpinskiosaurus	0.305648
Kotlassia	0.297297
Lethiscus	0.295455
Cardiocephalus	0.285714
Diceratosaurus	0.25
Tuditanus	0.240385
Archaeovenator	0.225
Pantylus	0.205479
Batrachiderpeton	0.153374
Diplocaulus	0.0909091
Diploceraspis	0.0774194

## Sheet: po roof
Oestocephalus	0.827586
Erpetosaurus	0.960452
Llistrofus	0.997006
Crassigyrinus	1.04167
Lethiscus	1.163
Adelospondylus	1.16393
Proterogyrinus	1.20513
Colosteus	1.27203
Batrachiderpeton	1.29365
Sauropleura scalaris	1.30909
Adelogyrinus	1.31915
Euryodus	1.34307
Odonterpeton	1.36047
Ventastega	1.36275
Eusthenopteron	1.36667
Greererpeton	1.38608
Neldasaurus	1.40435
Eocaecilia	1.44
Chenoprosopus	1.48544
cf. Calligenethlon	1.48936
Cardiocephalus	1.49123
Caerorhachis	1.51471
Chroniosaurus	1.51724
Celtedens	1.52941
Keraterpeton	1.54545
Dendrysekos	1.55978
Phlegethontia	1.56522
Palaeoherpeton	1.57407
Ossinodus	1.5814
Gephyrostegus	1.58929
Isodectes	1.59402
Australerpeton	1.59459
Eoherpeton	1.61404
Urocordylus	1.61538
Anthracosaurus	1.62393
Platyoposaurus	1.62857
Panderichthys	1.63636
Ichthyostega	1.63636
Ptyonius	1.64444
Konzhukovia	1.64789
Paleothyris	1.65517
Archegosaurus	1.6895
Utaherpeton	1.7037
Microbrachis	1.71429
Pholidogaster	1.72603
Westlothiana	1.73333
Ph. attheyi	1.73529
Micropholis	1.75556
Ph. scutigerum	1.76136
Eothyris	1.76829
Pantylus	1.77193
Orobates	1.77778
Archeria	1.78571
Sclerocephalus	1.81746
Acanthostega	1.84466
Tuditanus	1.85714
Silvanerpeton	1.86667
Saxonerpeton	1.86957
Edops	1.87912
Discosauriscus	1.91912
Phonerpeton	1.93548
Trimerorhachis	1.94086
Glanochthon	1.94406
Stegotretus	1.94444
Baphetes	1.94776
Broiliellus	1.94828
Acheloma	1.95312
Pederpes	1.95833
Balanerpeton	1.95946
Sparodus	1.96552
Hyloplesion	1.98462
Amphibamus	1.98837
Cochleosaurus	2
Ecolsonia	2
Cheliderpeton	2
Captorhinus	2.02564
Solenodonsaurus	2.02646
Bruktererpeton	2.03333
Kotlassia	2.04
Seymouria	2.05
Diceratosaurus	2.06061
Scincosaurus	2.075
Chelotriton	2.09459
Micromelerpeton	2.11392
Pelodosotis	2.11494
Megalocephalus	2.12069
Limnoscelis	2.12429
Diadectes	2.13924
Brachydectes	1.91818
Platyrhinops	2.18056
Karpinskiosaurus	2.20115
Deltaherpeton	2.20408
Utegenia	2.21429
Saharastega	2.21818
Petrolacosaurus	2.24167
Rhynchonkos	2.275
Mordex	2.29851
Iberospondylus	2.3053
Eucritta	2.31667
Capetus	2.32258
Doleserpeton	2.32308
Lydekkerina	2.35152
Neopteroplax	2.35385
Palatinerpeton	2.35821
Eoscopus	2.37838
Eryops	2.39161
Micraroter	2.43478
Asaphestera	2.48148
Crinodon	2.65385
Ariekanerpeton	2.65625
Tseajaia	2.65873
Schoenfelderpeton	2.71429
Microphon	2.82927
Batropetes	2.87273
Leptorophus	2.92308
Apateon	2.94872
Vieraella	3.125
Karaurus	3.15
Valdotriton	3.30612
Nigerpeton	3.40594
Notobatrachus	3.59375
Carrolla	3.83333
Quasicaecilia	4
Pangerpeton	4.15385
Tungussogyrinus	4.18182
Spathicephalus	4.46296
Triadobatrachus	4.66667
Gerobatrachus	5.17143
Diplocaulus	5.2381
Diploceraspis	5.84906
Acanthostomatops	5.875
Liaobatrachus	8.76923	not plotted

## Sheet: po table
Coloraderpeton	0.230769	0
Llistrofus	0.515152	0
Pseudophlegethontia	0.6	0
Phlegethontia	0.652174	0
Odonterpeton	0.697674	0
Sauropleura scalaris	0.705882	0
Eocaecilia	0.716	0
Erpetosaurus	0.724252	0
Oestocephalus	0.731707	0
Adelogyrinus	0.744681	0
Notobatrachus	0.8125	0
Sparodus	0.827586	0
Lethiscus	0.835616	0
Adelospondylus	0.852459	0
Captorhinus	0.90625	0
Neldasaurus	0.912371	0
Colosteus	0.983471	0
Ventastega	1	0
Urocordylus	1	0
Greererpeton	1.07353	1
Crassigyrinus	1.07812	1
Pholidogaster	1.08696	1
Isodectes	1.08974	1
Paleothyris	1.09091	1
Panderichthys	1.10345	1
Deltaherpeton	1.10638	1
Utaherpeton	1.11111	1
Euryodus	1.1194	1
Eusthenopteron	1.13043	1
Chroniosaurus	1.13158	1
Cheliderpeton	1.15493	1
Archegosaurus	1.15789	1
Baphetes	1.15909	1
Chenoprosopus	1.17045	1
Trimerorhachis	1.19075	1
Eucritta	1.2	1
Ptyonius	1.2	1
Australerpeton	1.20588	1
Glanochthon	1.21429	1
Ph. attheyi	1.22807	1
Cardiocephalus	1.22807	1
Pantylus	1.2807	1
Proterogyrinus	1.30435	1
Caerorhachis	1.30645	1
Silvanerpeton	1.34375	1
Ph. scutigerum	1.34615	1
Konzhukovia	1.34783	1
Sclerocephalus	1.35802	1
Neopteroplax	1.36585	1
Cochleosaurus	1.38776	1
Palatinerpeton	1.40385	1
Celtedens	1.41429	1
Platyoposaurus	1.4186	1
Balanerpeton	1.45763	1
Bruktererpeton	1.45833	1
Edops	1.45918	1
Acanthostega	1.46479	1
Dendrysekos	1.46575	1
Megalocephalus	1.46774	1
Capetus	1.5	1
Micromelerpeton	1.5	1
Westlothiana	1.5	1
Palaeoherpeton	1.5	1
Kotlassia	1.54167	2
Keraterpeton	1.54545	2
Whatcheeria	1.58621	2
Vieraella	1.59375	2
Mordex	1.60484	2
Gephyrostegus	1.61429	2
Lydekkerina	1.63448	2
Stegotretus	1.66667	2
Hyloplesion	1.66667	2
Ichthyostega	1.66667	2
Pederpes	1.67391	2
Iberospondylus	1.68539	2
Microbrachis	1.68919	2
Ossinodus	1.70455	2
Valdotriton	1.71053	2
Micropholis	1.75	2
Phonerpeton	1.77778	2
Discosauriscus	1.77966	2
Rhynchonkos	1.825	2
Pelodosotis	1.82857	2
Ariekanerpeton	1.85417	2
Seymouria	1.87692	2
Archeria	1.9	2
cf. Calligenethlon	1.92	2
Amphibamus	1.93814	2
Eoherpeton	1.94286	2
Brachydectes	1.96491	2
Solenodonsaurus	1.9717	2
Karpinskiosaurus	2.02013	3
Scincosaurus	2.0274	3
Doleserpeton	2.04444	3
Schoenfelderpeton	2.04762	3
Broiliellus	2.05	3
Bystrowiella	2.05128	3
Diceratosaurus	2.06061	3
Orobates	2.09167	3
Saharastega	2.10526	3
Nigerpeton	2.1129	3
Eoscopus	2.13043	3
Leptorophus	2.15625	3
Eryops	2.16667	3
Petrolacosaurus	2.18605	3
Micraroter	2.18919	3
Microphon	2.19512	3
Asaphestera	2.32558	3
Karaurus	2.33333	3
Acanthostomatops	2.33333	3
Limnoscelis	2.36441	3
Ecolsonia	2.37097	3
Anthracosaurus	2.38824	3
Acheloma	2.39506	3
Batrachiderpeton	2.39706	3
Eothyris	2.39773	3
Batropetes	2.44545	3
Platyrhinops	2.47059	3
Saxonerpeton	2.47059	3
Carrolla	2.5625	4
Utegenia	2.62687	4
Gerobatrachus	2.65714	4
Tungussogyrinus	2.79545	4
Apateon	2.86	4
Spathicephalus	2.86667	4
Tuditanus	2.88889	4
Archaeovenator	2.96296	4
Tseajaia	2.97561	4
Liaobatrachus	3.1	4
Crinodon	3.5	4
Chelotriton	3.57143	4
Triadobatrachus	3.72414	4
Quasicaecilia	3.80851	4
Diplocaulus	5.2381	4
Diploceraspis	5.84906	4
Diadectes	6.28	4

## Sheet: roof width, table length
Oestocephalus	0.878049
Llistrofus	1.00909
Erpetosaurus	1.12957
Lethiscus	1.163
Adelospondylus	1.16393
Adelogyrinus	1.31915
Odonterpeton	1.36047
Colosteus	1.3719
Euryodus	1.37313
Sauropleura scalaris	1.41176
Eocaecilia	1.44
Cardiocephalus	1.49123
Keraterpeton	1.54545
Phlegethontia	1.56522
Isodectes	1.59402
Greererpeton	1.61029
Urocordylus	1.61538
Ptyonius	1.64444
Caerorhachis	1.66129
Neldasaurus	1.66495
Utaherpeton	1.7037
Chenoprosopus	1.73864
Pantylus	1.77193
Eusthenopteron	1.78261
Pholidogaster	1.82609
Celtedens	1.85714
Panderichthys	1.86207
Microbrachis	1.94595
Sparodus	1.96552
Dendrysekos	1.96575
Proterogyrinus	2.04348
Cochleosaurus	2.05442
Diceratosaurus	2.06061
Trimerorhachis	2.08671
Kotlassia	2.125
Hyloplesion	2.15
Brachydectes	2.46784
Westlothiana	2.16667
Paleothyris	2.18182
Discosauriscus	2.21186
Ventastega	2.24194
Australerpeton	2.26923
Scincosaurus	2.27397
Rhynchonkos	2.275
Deltaherpeton	2.29787
Chroniosaurus	2.31579
Stegotretus	2.33333
Crassigyrinus	2.34375
Batrachiderpeton	2.39706
Archegosaurus	2.43421
Balanerpeton	2.45763
Captorhinus	2.46875
Mordex	2.48387
Seymouria	2.52308
Saharastega	2.52414
Saxonerpeton	2.52941
Bruktererpeton	2.54167
Gephyrostegus	2.54286
Konzhukovia	2.54348
Karpinskiosaurus	2.57047
Cheliderpeton	2.57746
Silvanerpeton	2.625
Eoherpeton	2.62857
Pelodosotis	2.62857
Platyoposaurus	2.65116
Ariekanerpeton	2.65625
Phonerpeton	2.66667
Orobates	2.66667
Lydekkerina	2.67586
Acanthostega	2.67606
Ichthyostega	2.7
Schoenfelderpeton	2.71429
Micromelerpeton	2.78333
cf. Calligenethlon	2.8
Micropholis	2.82143
Broiliellus	2.825
Sclerocephalus	2.82716
Microphon	2.82927
Batropetes	2.87273
Tuditanus	2.88889
Palaeoherpeton	2.93103
Baphetes	2.96591
Ph. scutigerum	2.98077
Ecolsonia	3
Archeria	3
Micraroter	3.02703
Palatinerpeton	3.03846
Pederpes	3.06522
Acheloma	3.08642
Ossinodus	3.09091
Ph. attheyi	3.10526
Asaphestera	3.11628
Vieraella	3.125
Petrolacosaurus	3.12791
Karaurus	3.15
Limnoscelis	3.18644
Capetus	3.27273
Eothyris	3.29545
Glanochthon	3.30952
Doleserpeton	3.35556
Eucritta	3.475
Edops	3.4898
Amphibamus	3.52577
Leptorophus	3.5625
Notobatrachus	3.59375
Solenodonsaurus	3.61321
Utegenia	3.70149
Neopteroplax	3.73171
Eoscopus	3.82609
Megalocephalus	3.96774
Crinodon	4.05882
Tseajaia	4.08537
Iberospondylus	4.1573
Tungussogyrinus	4.18182
Quasicaecilia	4.25532
Valdotriton	4.26316
Carrolla	4.3125
Anthracosaurus	4.47059
Apateon	4.6
Platyrhinops	4.61765
Gerobatrachus	5.17143
Eryops	5.18182
Diplocaulus	5.2381
Chelotriton	5.53571
Nigerpeton	5.54839
Diploceraspis	5.84906
Acanthostomatops	5.875
Diadectes	6.76
Triadobatrachus	7.24138
Spathicephalus	8.03333
Liaobatrachus	11.4

## Sheet: table width, roof length
Crassigyrinus	0.479167
Llistrofus	0.508982
Ventastega	0.607843
Erpetosaurus	0.615819
Phlegethontia	0.652174
Sauropleura scalaris	0.654545
Ph. attheyi	0.686275
Oestocephalus	0.689655
Odonterpeton	0.697674
Glanochthon	0.713287
Eocaecilia	0.716
Chroniosaurus	0.741379
Captorhinus	0.74359
Adelogyrinus	0.744681
Baphetes	0.761194
Proterogyrinus	0.769231
Neldasaurus	0.769565
Megalocephalus	0.784483
Edops	0.785714
Ph. scutigerum	0.795455
Eucritta	0.8
Archegosaurus	0.803653
Palaeoherpeton	0.805556
Notobatrachus	0.8125
Australerpeton	0.81982
Paleothyris	0.827586
Sparodus	0.827586
Adelospondylus	0.852459
Neopteroplax	0.861538
Eusthenopteron	0.866667
Anthracosaurus	0.867521
Platyoposaurus	0.871429
Ossinodus	0.872093
Sclerocephalus	0.873016
Konzhukovia	0.873239
Cheliderpeton	0.896175
Colosteus	0.911877
Greererpeton	0.924051
Iberospondylus	0.934579
Silvanerpeton	0.955556
Panderichthys	0.969697
Chenoprosopus	1
Eryops	1
Urocordylus	1
Gephyrostegus	1.00893
Acanthostega	1.00971
cf. Calligenethlon	1.02128
Pholidogaster	1.0274
Ichthyostega	1.0303
Deltaherpeton	1.06122
Capetus	1.06452
Pederpes	1.06944
Micropholis	1.08889
Palatinerpeton	1.08955
Isodectes	1.08974
Amphibamus	1.09302
Euryodus	1.09489
Whatcheeria	1.09524
Solenodonsaurus	1.10582
Trimerorhachis	1.10753
Utaherpeton	1.11111
Archeria	1.13095
Micromelerpeton	1.13924
Balanerpeton	1.16216
Lethiscus	1.163
Dendrysekos	1.16304
Celtedens	1.16471
Platyrhinops	1.16667
Bruktererpeton	1.16667
Caerorhachis	1.19118
Eoherpeton	1.19298
Westlothiana	1.2
Ptyonius	1.2
Cardiocephalus	1.22807
Pantylus	1.2807
Pangerpeton	1.28205
Eothyris	1.28659
Phonerpeton	1.29032
Batrachiderpeton	1.29365
Nigerpeton	1.29703
Eoscopus	1.32432
Valdotriton	1.32653
Cochleosaurus	1.35099
Chelotriton	1.35135
Archaeovenator	1.37931
Stegotretus	1.38889
Orobates	1.39444
Broiliellus	1.41379
Doleserpeton	1.41538
Lydekkerina	1.43636
Pelodosotis	1.47126
Kotlassia	1.48
Mordex	1.48507
Microbrachis	1.4881
Acheloma	1.51562
Seymouria	1.525
Hyloplesion	1.53846
Discosauriscus	1.54412
Keraterpeton	1.54545
Petrolacosaurus	1.56667
Utegenia	1.57143
Limnoscelis	1.57627
Ecolsonia	1.58065
Spathicephalus	1.59259
Vieraella	1.59375
Karpinskiosaurus	1.72989
Saharastega	1.74545
Micraroter	1.76087
Leptorophus	1.76923
Rhynchonkos	1.825
Saxonerpeton	1.82609
Apateon	1.83333
Scincosaurus	1.85
Asaphestera	1.85185
Ariekanerpeton	1.85417
Tuditanus	1.85714
Brachydectes	1.52727
Tseajaia	1.93651
Diadectes	1.98734
Schoenfelderpeton	2.04762
Diceratosaurus	2.06061
Microphon	2.19512
Carrolla	2.27778
Crinodon	2.28846
Karaurus	2.33333
Acanthostomatops	2.33333
Liaobatrachus	2.38462
Triadobatrachus	2.4
Batropetes	2.44545
Gerobatrachus	2.65714
Tungussogyrinus	2.79545
Quasicaecilia	3.58
Diplocaulus	5.2381
Diploceraspis	5.84906
