# Supplementary material for: Phylogeny of Paleozoic limbed vertebrates reassessed through revision and expansion of the largest published relevant data matrix
Source: PeerJ. 2019 Jan 4;6:e5565. doi: 10.7717/peerj.5565 (PMC6322490; doi:10.7717/peerj.5565)
Supplement: Supplemental Information 8 — The line numbers are the numbers of the characters (1–277). Column A shows the minimum of necessary steps per character (its number of states minus one); column B shows the steps actually found in R1 or R4 on the trees included in Data S3; column C is the difference between A and B, sorted from lowest to highest in column E, counted in columns G and H and plotted in the file as well as in Fig. 22. The line between the data points in the plots is meaningless, but makes it easier to compare the distributions to an exponential curve. Compare Goloboff, Torres & Arias (2018: fig. 1(a)). [file peerj-07-5565-s008.xlsx]

## Sheet: R1
3	23	20		0
1	3	2		0		number of extra steps	number of characters
4	51	47		0		0	25
1	8	7		0		1	36
1	2	1		0		2	35
1	1	0		0		3	21
2	12	10		0		4	22
1	1	0		0		5	12
1	6	5		0		6	20
1	11	10		0		7	16
1	15	14		0		8	18
1	1	0		0		9	8
1	18	17		0		10	14
1	11	10		0		11	4
1	3	2		0		12	5
2	12	10		0		13	5
1	15	14		0		14	11
1	4	3		0		15	1
1	10	9		0		16	3
1	9	8		0		17	5
2	12	10		0		18	1
2	14	12		0		19	1
1	2	1		0		20	4
1	3	2		0		21	0
2	10	8		0		22	0
1	4	3		1		23	0
2	35	33		1		24	1
1	10	9		1		25	1
1	1	0		1		26	1
1	8	7		1		27	0
1	5	4		1		28	1
4	14	10		1		29	0
2	4	2		1		30	3
1	18	17		1		31	0
1	6	5		1		32	0
1	8	7		1		33	1
1	18	17		1		34	0
1	18	17		1		35	0
2	8	6		1		36	0
2	13	11		1		37	0
1	14	13		1		38	0
1	6	5		1		39	0
1	19	18		1		40	0
1	4	3		1		41	0
1	3	2		1		42	0
1	7	6		1		43	0
1	7	6		1		44	0
1	7	6		1		45	0
1	4	3		1		46	0
1	5	4		1		47	2
1	3	2		1		48	0
1	13	12		1		49	0
1	5	4		1		50	0
3	20	17		1		51	0
1	7	6		1		52	0
1	20	19		1		53	0
1	14	13		1		54	0
1	6	5		1		55	0
1	2	1		1		56	0
1	2	1		1		57	0
1	5	4		1		58	0
1	3	2		2		59	0
1	13	12		2		60	0
1	2	1		2		61	0
1	13	12		2		62	0
1	15	14		2		63	0
1	5	4		2		64	0
1	9	8		2		65	0
2	17	15		2		66	0
1	1	0		2		67	0
1	2	1		2		68	0
2	15	13		2		69	0
1	6	5		2		total	277
1	9	8		2
1	7	6		2
1	15	14		2
1	4	3		2
1	2	1		2
1	2	1		2
1	3	2		2
1	1	0		2
2	6	4		2
1	15	14		2
2	13	11		2
2	4	2		2
2	30	28		2
2	32	30		2
2	9	7		2
1	1	0		2
2	27	25		2
1	8	7		2
2	32	30		2
1	2	1		2
3	10	7		2
4	51	47		2
1	1	0		2
1	4	3		3
1	5	4		3
1	4	3		3
4	13	9		3
4	12	8		3
2	18	16		3
1	7	6		3
1	15	14		3
5	31	26		3
1	11	10		3
1	6	5		3
1	9	8		3
1	7	6		3
1	6	5		3
1	15	14		3
1	10	9		3
2	6	4		3
1	3	2		3
3	23	20		3
1	10	9		3
1	3	2		3
1	5	4		4
3	16	13		4
2	6	4		4
1	4	3		4
1	8	7		4
1	15	14		4
1	1	0		4
1	1	0		4
1	1	0		4
1	6	5		4
1	9	8		4
1	7	6		4
1	8	7		4
1	17	16		4
2	12	10		4
1	5	4		4
5	12	7		4
2	7	5		4
1	7	6		4
2	22	20		4
1	5	4		4
2	16	14		4
1	9	8		5
1	3	2		5
2	6	4		5
1	9	8		5
1	15	14		5
2	22	20		5
4	28	24		5
1	2	1		5
1	5	4		5
1	2	1		5
1	3	2		5
2	12	10		5
1	2	1		6
1	1	0		6
1	1	0		6
1	3	2		6
2	9	7		6
1	7	6		6
1	2	1		6
1	2	1		6
1	3	2		6
2	5	3		6
1	4	3		6
1	3	2		6
1	2	1		6
1	4	3		6
1	3	2		6
1	3	2		6
1	5	4		6
1	5	4		6
1	2	1		6
1	3	2		6
1	5	4		7
1	4	3		7
1	2	1		7
1	2	1		7
1	5	4		7
1	9	8		7
1	3	2		7
2	15	13		7
1	10	9		7
1	7	6		7
1	4	3		7
2	9	7		7
1	17	16		7
1	7	6		7
1	4	3		7
1	1	0		7
1	3	2		8
3	33	30		8
3	9	6		8
1	1	0		8
1	2	1		8
1	3	2		8
1	11	10		8
2	12	10		8
1	10	9		8
1	12	11		8
1	2	1		8
1	7	6		8
1	11	10		8
1	4	3		8
1	1	0		8
1	4	3		8
1	7	6		8
1	8	7		8
1	1	0		9
1	3	2		9
1	8	7		9
1	2	1		9
2	7	5		9
2	4	2		9
1	3	2		9
1	2	1		9
2	10	8		10
1	7	6		10
1	2	1		10
1	7	6		10
1	2	1		10
2	10	8		10
1	2	1		10
1	2	1		10
2	16	14		10
1	1	0		10
1	3	2		10
1	9	8		10
1	8	7		10
1	4	3		10
1	10	9		11
1	1	0		11
2	4	2		11
2	14	12		11
1	9	8		12
1	6	5		12
2	10	8		12
1	1	0		12
1	5	4		12
1	1	0		13
1	11	10		13
1	3	2		13
1	4	3		13
1	8	7		13
1	2	1		14
1	2	1		14
2	2	0		14
1	9	8		14
1	12	11		14
1	3	2		14
1	6	5		14
1	3	2		14
1	9	8		14
1	7	6		14
1	4	3		14
1	3	2		15
1	3	2		16
1	2	1		16
1	2	1		16
1	7	6		17
1	2	1		17
1	2	1		17
1	3	2		17
1	3	2		17
1	4	3		18
1	8	7		19
1	2	1		20
1	3	2		20
1	5	4		20
1	2	1		20
1	2	1		24
1	9	8		25
2	2	0		26
1	5	4		28
1	11	10		30
1	2	1		30
1	4	3		30
1	1	0		33
4	8	4		47
1	1	0		47
minimum steps	steps in R1	extra steps		extra steps sorted

## Sheet: R4
3	36	33		0
1	3	2		0		number of extra steps	number of characters
4	71	67		0		0	12
1	10	9		0		1	30
1	5	4		0		2	21
1	2	1		0		3	26
2	19	17		0		4	21
1	1	0		0		5	12
1	7	6		0		6	11
1	13	12		0		7	12
1	18	17		0		8	12
1	1	0		0		9	17
1	28	27		1		10	10
1	14	13		1		11	13
1	4	3		1		12	6
2	17	15		1		13	9
1	18	17		1		14	9
1	4	3		1		15	3
1	10	9		1		16	6
1	10	9		1		17	8
2	18	16		1		18	1
2	16	14		1		19	10
1	2	1		1		20	2
1	8	7		1		21	0
2	21	19		1		22	5
1	4	3		1		23	0
2	49	47		1		24	2
1	19	18		1		25	2
1	1	0		1		26	0
1	10	9		1		27	3
1	5	4		1		28	1
4	17	13		1		29	1
2	8	6		1		30	0
1	25	24		1		31	0
1	11	10		1		32	0
1	11	10		1		33	2
1	26	25		1		34	3
1	28	27		1		35	0
2	10	8		1		36	0
2	16	14		1		37	1
1	20	19		1		38	0
1	8	7		1		39	0
1	30	29		2		40	0
1	5	4		2		41	0
1	3	2		2		42	0
1	15	14		2		43	0
1	6	5		2		44	1
1	8	7		2		45	2
1	5	4		2		46	0
1	12	11		2		47	1
1	4	3		2		48	0
1	20	19		2		49	0
1	6	5		2		50	0
3	25	22		2		51	0
1	10	9		2		52	0
1	26	25		2		53	0
1	18	17		2		54	0
1	8	7		2		55	0
1	2	1		2		56	0
1	2	1		2		57	0
1	11	10		2		58	0
1	3	2		2		59	0
1	20	19		2		60	0
1	2	1		3		61	0
1	13	12		3		62	0
1	23	22		3		63	0
1	8	7		3		64	0
1	16	15		3		65	0
2	19	17		3		66	0
1	2	1		3		67	0
1	2	1		3		68	0
2	24	22		3		69	1
1	10	9		3		total	276
1	17	16		3
1	9	8		3
1	18	17		3
1	4	3		3
1	4	3		3
1	4	3		3
1	6	5		3
1	2	1		3
2	6	4		3
1	20	19		3
2	18	16		3
2	6	4		3
2	36	34		3
2	46	44		3
2	13	11		3
1	2	1		3
2	39	37		4
1	9	8		4
2	47	45		4
1	3	2		4
3	12	9		4
4	73	69		4
1	2	1		4
1	6	5		4
1	5	4		4
1	5	4		4
4	20	16		4
4	20	16		4
2	21	19		4
1	9	8		4
1	20	19		4
5	39	34		4
1	15	14		4
1	10	9		4
1	14	13		4
1	8	7		4
1	8	7		4
1	17	16		5
1	18	17		5
2	11	9		5
1	4	3		5
3	36	33		5
1	12	11		5
1	15	14		5
1	13	12		5
3	22	19		5
2	6	4		5
1	5	4		5
1	13	12		5
1	21	20		6
1	2	1		6
1	3	2		6
1	1	0		6
1	8	7		6
1	10	9		6
1	10	9		6
1	14	13		6
1	23	22		6
2	19	17		6
1	6	5		6
5	16	11		7
2	13	11		7
1	13	12		7
2	30	28		7
1	10	9		7
2	26	24		7
1	12	11		7
1	4	3		7
2	6	4		7
1	12	11		7
1	20	19		7
2	29	27		7
4	38	34		8
1	4	3		8
1	5	4		8
1	5	4		8
1	4	3		8
2	17	15		8
1	4	3		8
1	3	2		8
1	1	0		8
1	9	8		8
2	16	14		8
1	7	6		8
1	5	4		9
1	2	1		9
1	4	3		9
2	5	3		9
1	8	7		9
1	3	2		9
1	2	1		9
1	6	5		9
1	6	5		9
1	3	2		9
1	7	6		9
1	8	7		9
1	6	5		9
1	5	4		9
1	7	6		9
1	7	6		9
1	3	2		9
1	4	3		10
1	7	6		10
1	14	13		10
1	7	6		10
2	22	20		10
1	11	10		10
1	9	8		10
1	4	3		10
2	11	9		10
1	23	22		10
1	9	8		11
1	5	4		11
1	1	0		11
1	3	2		11
3	48	45		11
3	11	8		11
1	2	1		11
1	4	3		11
1	4	3		11
1	13	12		11
2	15	13		11
1	11	10		11
1	15	14		11
1	2	1		12
1	12	11		12
1	12	11		12
1	4	3		12
1	2	1		12
1	4	3		12
1	7	6		13
1	9	8		13
1	3	2		13
1	3	2		13
1	10	9		13
1	2	1		13
2	7	5		13
2	5	3		13
1	5	4		13
1	3	2		14
2	13	11		14
1	10	9		14
1	3	2		14
1	10	9		14
1	2	1		14
2	10	8		14
1	2	1		14
1	2	1		14
2	21	19		15
1	1	0		15
1	3	2		15
1	10	9		16
1	11	10		16
1	4	3		16
1	12	11		16
1	3	2		16
2	3	1		16
2	16	14		17
1	11	10		17
1	8	7		17
2	15	13		17
1	1	0		17
1	6	5		17
1	1	0		17
1	12	11		17
1	3	2		18
1	5	4		19
1	9	8		19
1	2	1		19
1	2	1		19
2	3	1		19
1	14	13		19
1	15	14		19
1	7	6		19
1	8	7		19
1	3	2		19
1	11	10		20
1	9	8		20
1	5	4		22
1	4	3		22
1	3	2		22
1	4	3		22
1	2	1		22
1	11	10		24
1	2	1		24
1	2	1		25
1	2	1		25
1	3	2		27
1	5	4		27
1	11	10		27
1	3	2		28
2	7	5		29
1	5	4		33
1	2	1		33
1	2	1		34
1	12	11		34
2	2	0		34
1	7	6		37
1	14	13		44
1	4	3		45
1	4	3		45
1	1	0		47
4	9	5		67
1	1	0		69
minimum steps	steps in R4	extra steps		extra steps sorted
